# Supplementary material for: β‐Elemene Selectively Inhibits the Proliferation of Glioma Stem‐Like Cells Through the Downregulation of Notch1
Source: PubMed Central journal article supplement (PMC5442766; doi:10.5966/sctm.2016-0009), 2016-10-07
Supplement: SCT3-6-0830-s001.pdf [file SCT3-6-0830-s001.pdf]

Supplemental Figure – Chen et al.

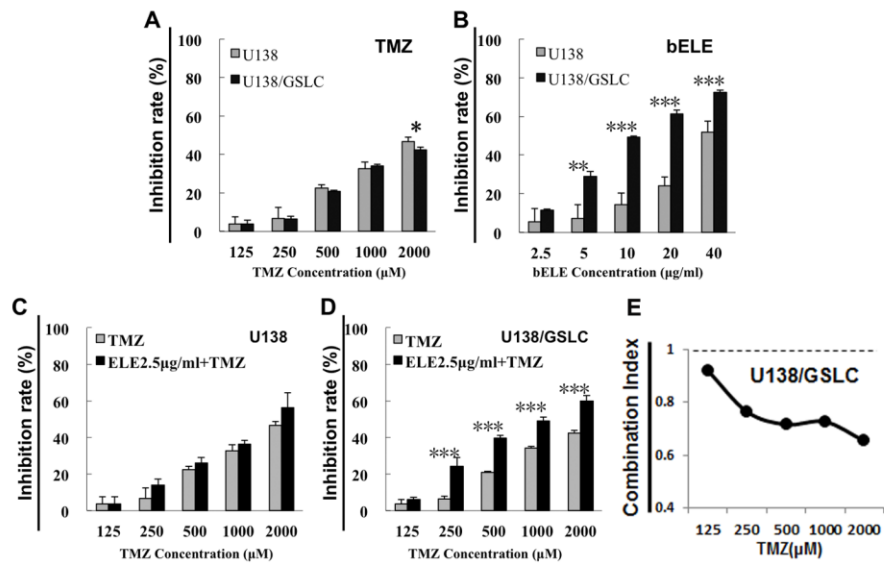

**Figure S1. U138/GSLCs is more sensitive to bELE than to TMZ and bELE sensitizes U138/GSLC to TMZ.**

A and B, the inhibition rates (IR) of TMZ and bELE on U138 and U138/GSLC. C and D, bELE (2.5 μg/ml) promoted the inhibition effect of TMZ on U138/GSLC. E, the combination index (CI) of bELE (2.5 μg/ml) and TMZ on U138/GSLC. \*:  $p < 0.05$ , \*\*:  $p < 0.01$ , \*\*\*:  $p < 0.001$ ,  $n = 4$ .
